# Supplementary material for: Chemical Transfers Occurring Through Oenococcus oeni Biofilm in Different Enological Conditions
Source: Front Nutr. 2019 Jun 25;6:95. doi: 10.3389/fnut.2019.00095 (PMC6603213; doi:10.3389/fnut.2019.00095)
Supplement: Supplementary file 1 [file Data_Sheet_1.docx]

**Supplementary Information**

Chemical transfers occurring through *Oenococcus oeni* biofilm in different enological conditions

Christian Coelho1, *, Régis D. Gougeon1, Luc Perekelkine2, Hervé Alexandre3, Jean Guzzo3, Stéphanie Weidmann3

1UMR A 02.102 PAM Laboratoire PCAV AgroSup Dijon, Université de Bourgogne, Institut Universitaire de la Vigne et du Vin Jules Guyot, rue Claude Ladrey, BP 27877, 21078 Dijon Cedex, France

2SAAT Sayens, Maison régionale de l'innovation, 64a Rue Sully, 21000 Dijon

3UMR A 02.102 PAM Laboratoire VAlMiS AgroSup Dijon, Université de Bourgogne, Institut Universitaire de la Vigne et du Vin Jules Guyot, rue Claude Ladrey, BP 27877, 21078 Dijon Cedex, France.

Table S.I.1 : Oenological parameters followed during fermentation for the three oenological conditions. Among the parameters, TA and VA represent respectively total acidity in g/L in H2SO4 and volatile acidity in g/L in CH3COOH. Glu/Fru represents the ratio of glucose/fructose.

A) Condition 1 :

PAD1 :

| Time / days | 10 | 11 | 14 | 18 | 21 | 24 | 28 | 34 | 41 |
| --- | --- | --- | --- | --- | --- | --- | --- | --- | --- |
| Malic acid g/L | 2,16 | 2,05 | 1,96 | 1,69 | 1,63 | 1,63 | 1,46 | 1,08 | 0,63 |
| O.o UFC/mL | 6,44E+05 | 6,67E+04 | 5,40E+05 | 9,67E+05 | 9,67E+05 | 6,00E+05 | 1,20E+06 | 1,73E+06 | - |
| Ethanol % | 12,4 | 12,92 | 12,44 | 13 | 13 | 13,0 | 12,98 | 12,88 | 12,94 |
| TA g/L | 4,8 | 4,82 | 4,8 | 4,81 | 4,78 | 4,74 | 4,66 | 4,61 | 4,61 |
| Glu/Fru | 0,0 | 0,0 | 0,2 | 0,0 | 0,0 | 0,0 | 0,0 | 0,0 | 0,0 |
| pH | 3,23 | 3,20 | 3,21 | 3,25 | 3,24 | 3,24 | 3,26 | 3,28 | 3,32 |
| VA g/L | 0,31 | 0,43 | 0,43 | 0,46 | 0,45 | 0,44 | 0,46 | 0,46 | 0,51 |

BF1 :

| Time / days | 10 | 11 | 14 | 18 | 21 | 24 | 28 | 34 | 41 |
| --- | --- | --- | --- | --- | --- | --- | --- | --- | --- |
| Malic acid g/L | 1,87 | 2,13 | 1,97 | 2,46 | 1,90 | 1,85 | 2,00 | 1,92 | 1,46 |
| O.o UFC/mL | 4,67E+05 | 3,33E+03 | 7,33E+03 | 5,33E+03 | 3,33E+03 | 4,33E+03 | 5,67E+03 | 3,67E+04 | - |
| Ethanol % | 12,58 | 12,88 | 12,87 | 12,96 | 12,97 | 12,91 | 12,81 | 12,17 | 12,76 |
| TA g/L | 4,8 | 4,8 | 4,8 | 4,8 | 4,9 | 4,9 | 4,9 | 4,9 | 4,9 |
| Ac.malique | 2,1 | 2,1 | 2,1 | 2,1 | 2,2 | 2,2 | 2,2 | 2,0 | 2,0 |
| Glu/Fru | 0,0 | 0,0 | 0,0 | 0,0 | 0,0 | 0,0 | 0,0 | 0,0 | 0,0 |
| pH | 3,20 | 3,24 | 3,23 | 3,25 | 3,25 | 3,25 | 3,27 | 3,33 | 3,30 |
| VA g/L | 0,41 | 0,44 | 0,44 | 0,46 | 0,44 | 0,45 | 0,45 | 0,39 | 0,49 |

B) Condition 2 :

PAD2 :

| Time /days | 10 | 14 | 17 | 21 | 26 | 31 | 34 | 40 | 52 | 56 | 60 | 63 | 69 | 76 |
| --- | --- | --- | --- | --- | --- | --- | --- | --- | --- | --- | --- | --- | --- | --- |
| Malic Acid g/L | 2,15 | 1,98 | 1,98 | 2,26 | 1,93 | 1,92 | 2,01 | 1,80 | 1,79 | 1,12 | 1,04 | 1,06 | 0,32 | 0,01 |
| O.o UFC/mL | 2,00E+06 | 1,00E+00 | 1,00E+00 | 1,00E+00 | 1,33E+05 | 1,37E+04 | 9,33E+03 | 1,90E+04 | 9,33E+04 | 3,33E+05 | 6,67E+05 | 1,33E+06 | 4,67E+05 | - |
| Ethanol % | 12,9 | 12,93 | 12,9 | 12,9 | 12,92 | 12,92 | 12,78 | 12,88 | 12,96 | 12,93 | 12,83 | 12,96 | 12,7 | 12,75 |
| TA g/L | 5,2 | 4,97 | 4,99 | 4,99 | 5,06 | 5,00 | 4,97 | 4,95 | 4,88 | 4,8 | 4,75 | 4,2 | 4,51 | 4,4 |
| Ac.malique | 1,9 | 2,1 | 2,1 | 2,1 | 2,2 | 2,1 | 2,2 | 2 | 1,8 | 1,4 | 1,3 | 1,3 | 0,6 | 0,5 |
| Glu/Fru | 0,4 | 0,0 | 0,0 | 0,0 | 0,0 | 0,0 | 0,0 | 0,0 | 0,0 | 0,0 | 0,0 | 0,0 | 0,0 | 0,0 |
| pH | 3,13 | 3,23 | 3,21 | 3,22 | 3,22 | 3,24 | 3,26 | 3,25 | 3,26 | 3,28 | 3,28 | 3,26 | 3,29 | 3,32 |
| VA g/L | 0,41 | 0,44 | 0,43 | 0,45 | 0,47 | 0,44 | 0,46 | 0,47 | 0,46 | 0,49 | 0,49 | 0,46 | 0,43 | 0,51 |

BF2 :

| Time /days | 10 | 14 | 17 | 21 | 24 | 26 | 31 | 34 | 38 | 40 | 44 | 48 |
| --- | --- | --- | --- | --- | --- | --- | --- | --- | --- | --- | --- | --- |
| Malic Acid g/L | 2,15 | 2,02 | 1,84 | 1,60 | 1,67 | 1,58 | 1,17 | 0,64 | 0,39 | 0,11 | 0,00 | 0,02 |
| O.o UFC/mL |  | 2,10E+05 | 2,73E+05 | 3,83E+05 | 4,67E+05 | 4,00E+05 | 4,93E+05 | 1,93E+06 | 3,30E+06 | 1,63E+05 | 7,00E+05 | 2,07E+04 |
| Ethanol % | 12,87 | 13,07 | 12,66 | 12,89 | 12,97 | 12,86 | 12,81 | 12,99 | 12,84 | 12,87 | 12,99 | 12,72 |
| TA g/L | 5,2 | 5,1 | 5,1 | 5,0 | 4,9 | 4,9 | 4,7 | 4,6 | 4,4 | 4,3 | 4,4 | 4,4 |
| Ac.malique | 1,9 | 1,9 | 2,0 | 1,8 | 1,7 | 1,6 | 1,3 | 1,0 | 0,5 | 0,2 | 0,2 | 0,4 |
| Glu/Fru | 0,4 | 0,0 | 0,0 | 0,0 | 0,0 | 0,0 | 0,0 | 0,0 | 0,0 | 0,0 | 0,0 | 0,0 |
| pH | 3,13 | 3,17 | 3,16 | 3,17 | 3,22 | 3,22 | 3,25 | 3,24 | 3,25 | 3,29 | 3,30 | 3,32 |
| VA g/L | 0,41 | 0,40 | 0,44 | 0,43 | 0,44 | 0,43 | 0,43 | 0,47 | 0,44 | 0,45 | 0,46 | 0,50 |

C) Condition 3 :

PAD 3 :

| Time /days | 1 | 2 | 6 | 10 | 31 | 36 | 38 | 41 | 50 | 62 | 66 | 70 | 73 | 79 |
| --- | --- | --- | --- | --- | --- | --- | --- | --- | --- | --- | --- | --- | --- | --- |
| Malic Acid g/L | 3,13 | 2,95 | 2,15 | 2,37 | 2,34 | 2,32 | 2,01 | 2,02 | 1,83 | 1,24 | 0,55 | 0,25 | 0,16 | 0,09 |
| O.o UFC/mL | 1,33E+06 | 1,90E+06 | 1,67E+04 | 1,00E+00 | 1,00E+00 | 7,00E+04 | 2,03E+04 | 2,00E+03 | 2,63E+03 | 1,27E+05 | 3,67E+05 | 4,67E+05 | 8,67E+05 | 2,50E+05 |
| Ethanol % | 0,1 | 0,8 | 12,0 | 12,63 | 12,75 | 12,73 | 12,55 | 12,71 | 12,47 | 12,73 | 12,71 | 12,75 | 12,72 | 12,75 |
| TA g/L | 4,7 | 4,9 | 5,4 | 5,16 | 4,9 | 4,96 | 4,84 | 4,86 | 4,76 | 4,42 | 4,39 | 4,31 | 4,25 | 4,23 |
| Ac.malique | 3,7 | 3,5 | 2,7 | 1,9 | 2,0 | 2,1 | 2,0 | 1,9 | 1,8 | 1 | 0,5 | 0,3 | 0,2 | 0,3 |
| Glu/Fru | 205,0 | 183,5 | 5,3 | 0,6 | 0,0 | 0,0 | 0,0 | 0,0 | 0,0 | 0,0 | 0,0 | 0,0 | 0,0 | 0,0 |
| pH | 3,20 | 3,24 | 3,10 | 3,09 | 3,09 | 3,13 | 3,10 | 3,12 | 3,12 | 3,17 | 3,18 | 3,18 | 3,19 | 3,21 |
| VA g/L | 0,24 | 0,24 | 0,23 | 0,32 | 0,33 | 0,39 | 0,34 | 0,35 | 0,35 | 0,36 | 0,37 | 0,37 | 0,36 | 0,35 |

BF3 :

| Time /days | 1 | 2 | 6 | 8 | 10 | 14 | 17 | 20 | 27 | 31 | 36 | 41 | 44 | 48 |
| --- | --- | --- | --- | --- | --- | --- | --- | --- | --- | --- | --- | --- | --- | --- |
| Malic Acid g/L | 3,08 | 2,98 | 2,03 | 1,86 | 2,02 | 1,89 | 1,91 | 1,51 | 1,46 | 1,32 | 0,75 | 0,33 | 0,21 | 0,12 |
| O.o UFC/mL | 1,60E+06 | 2,00E+05 | 2,00E+04 | 5,33E+04 | 3,67E+04 | 2,77E+04 | 2,07E+04 | 2,23E+04 | 2,67E+04 | 2,87E+04 | 9,00E+04 | 2,80E+05 | 2,03E+05 | 1,83E+05 |
| Ethanol % | 0,1 | 0,5 | 10,8 | 12,0 | 12,4 | 12,7 | 12,7 | 12,5 | 11,8 | 12,7 | 12,7 | 12,7 | 12,7 | 12,7 |
| TA g/L | 4,7 | 5,0 | 5,1 | 5,1 | 4,9 | 4,9 | 4,8 | 4,8 | 4,9 | 4,7 | 4,5 | 4,3 | 4,3 | 4,2 |
| Ac.malique | 3,7 | 3,6 | 2,3 | 2,4 | 1,8 | 1,6 | 1,6 | 1,6 | 1,9 | 1,2 | 0,8 | 0,3 | 0,2 | 0,1 |
| Glu/Fru | 205,0 | 191,4 | 26,7 | 6,1 | 1,3 | 0,0 | 0,0 | 0,0 | 0,0 | 0,0 | 0,0 | 0,0 | 0,0 | 0,0 |
| pH | 3,20 | 3,21 | 3,11 | 3,11 | 3,14 | 3,11 | 3,09 | 3,14 | 3,12 | 3,22 | 3,22 | 3,20 | 3,20 | 3,21 |
| VA g/L | 0,24 | 0,25 | 0,22 | 0,19 | 0,30 | 0,36 | 0,34 | 0,34 | 0,34 | 0,45 | 0,47 | 0,38 | 0,36 | 0,38 |

Table S.I.2 : Time required to AF and MLF to achieve based on the following criteria : Glu/Fru below 2 g.L-1 and L-malic acid concentration below 0.2 g.L-1 in the three BF/PAD conditions.

| Conditions | Time to achieve AF /day | Time to achieve MLF /day | Total Fermentation time (AF+MLF) / day |
| --- | --- | --- | --- |
| PAD 1 | 10 | 63 | 73 |
| BF 1 | 10 | 43 | 53 |
| PAD 2 | 10 | 76 | 86 |
| BF 2 | 10 | 31 | 41 |
| PAD 3 | 10 | 73 | 73 |
| BF 3 | 10 | 48 | 48 |

Figure S.I.1 : Excitation (A) and Emission (B) spectra of the four PARAFAC components obtained by a split-half analysis with four independent splits and validated for excitation spectra (C) and emission spectra (D)

| A)  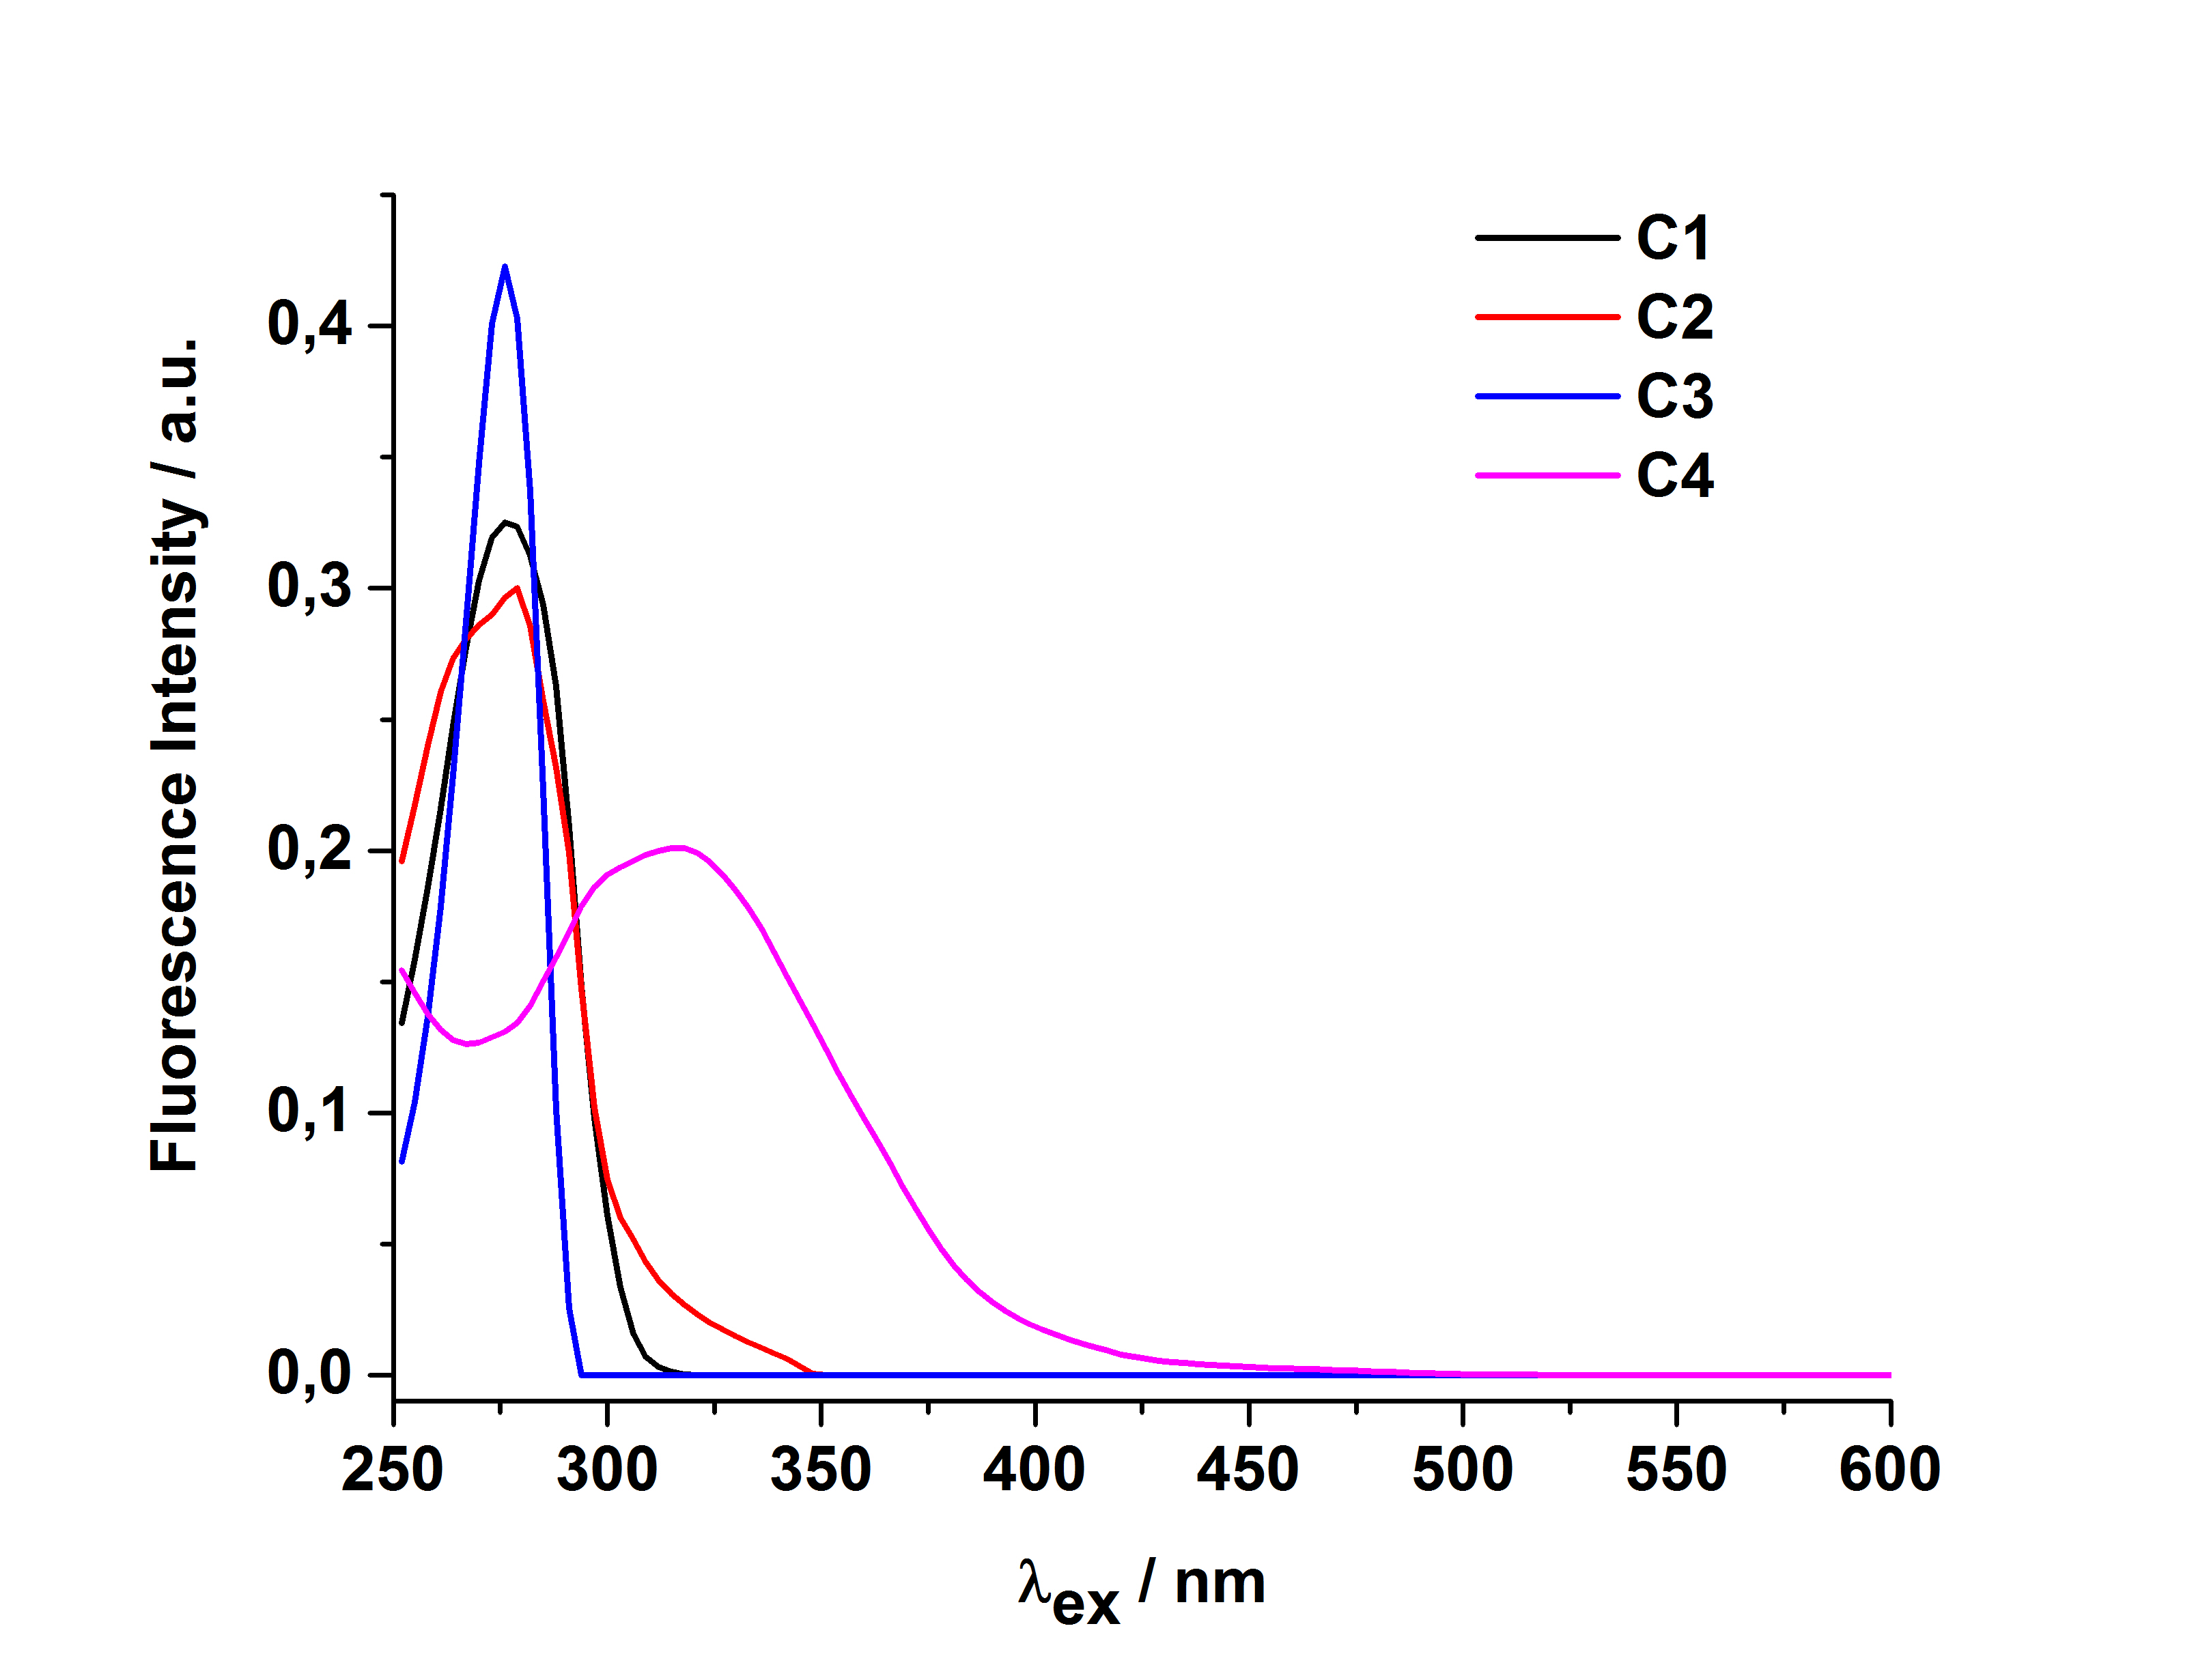 | C)  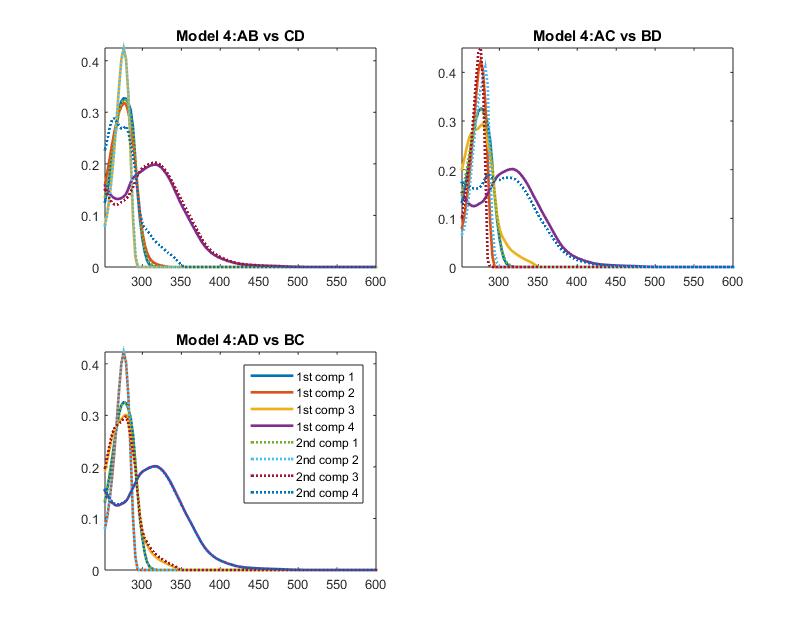 |
| --- | --- |
| B)  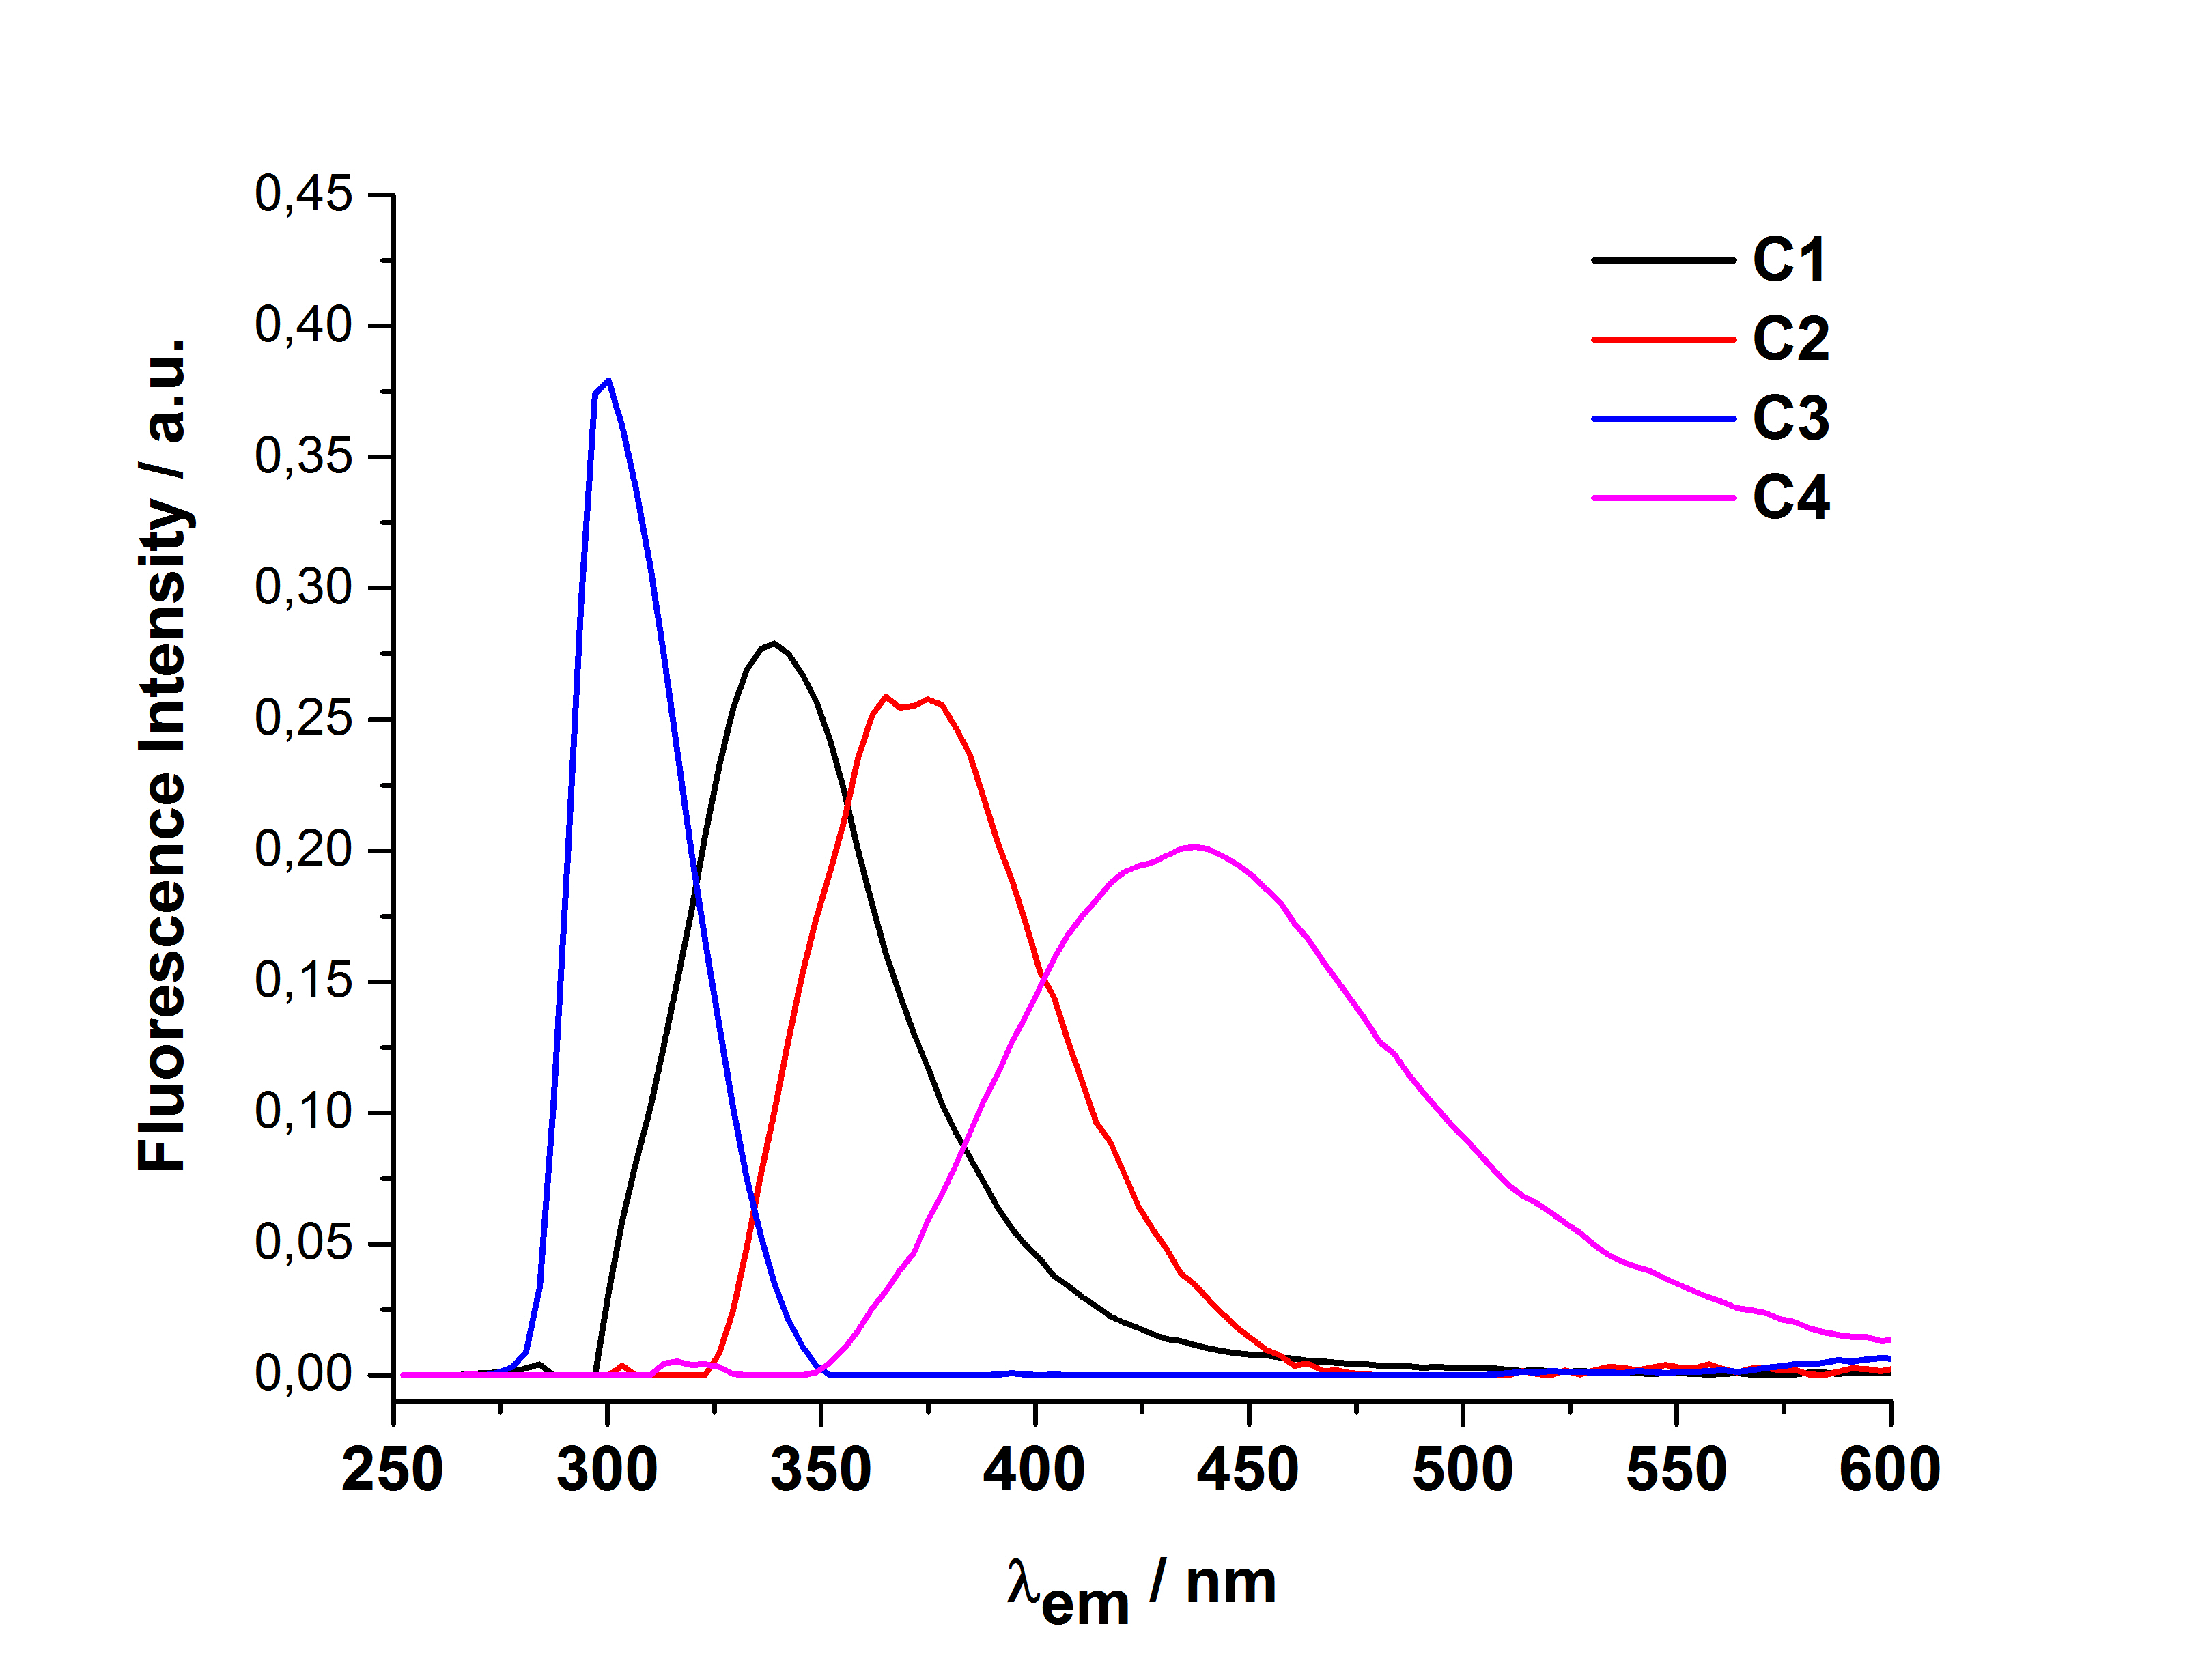 | D)  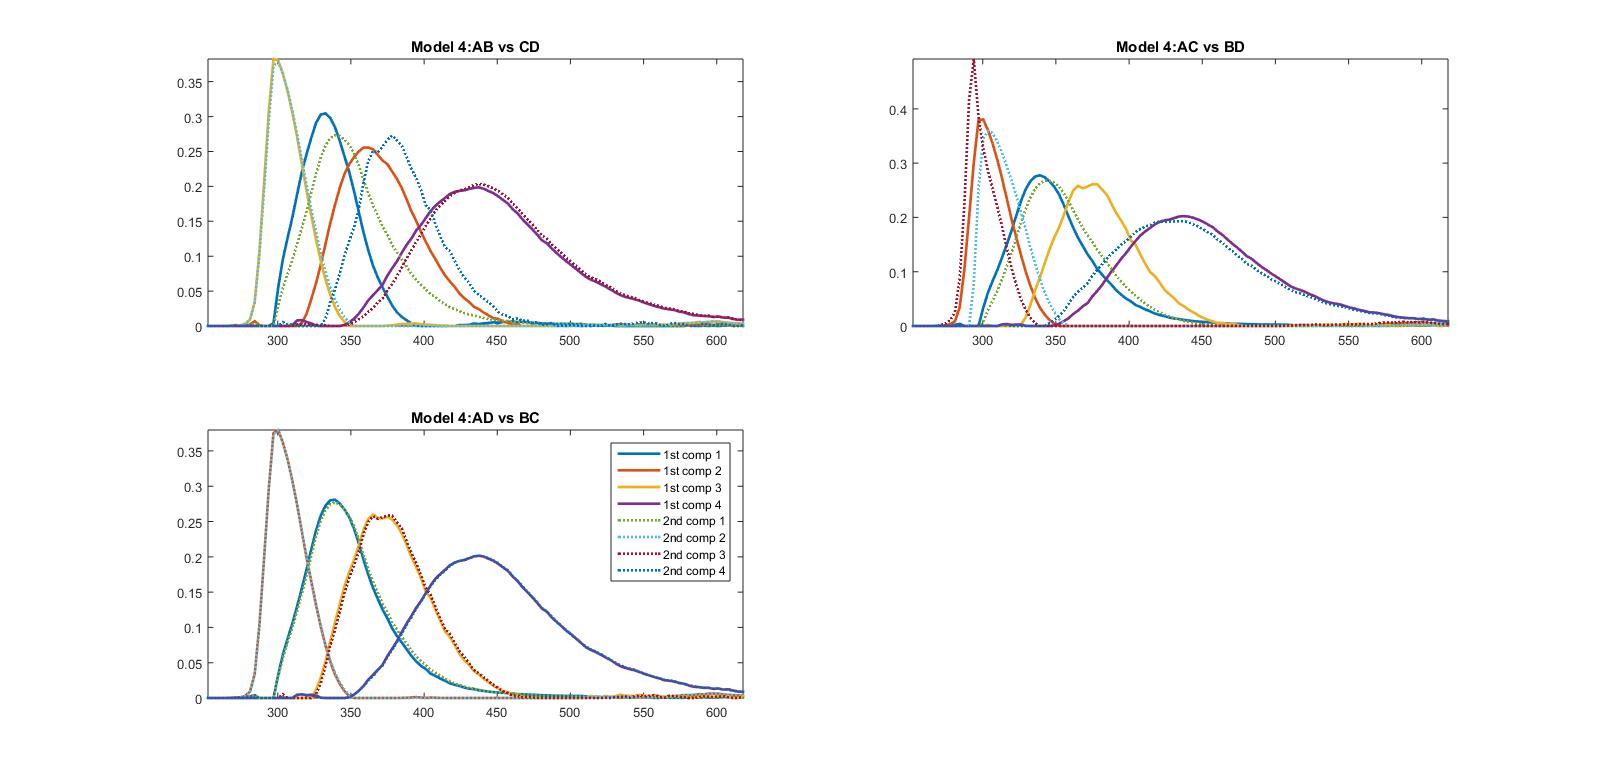 |

Table S.I.3 : Fmax values of the four PARAFAC components for Chardonnay white wines at the different fermentation days resulting from the wood containing BF/PAD Conditions 2 and 3.

| **Condition** | **Modality** | **Fermentation days** | **C1** | **C2** | **C3** | **C4** |
| --- | --- | --- | --- | --- | --- | --- |
| **Condition 2** | **BF 2** | **14** | 1,346 | 1,336 | 3,131 | 0,240 |
| **21** | 1,292 | 1,320 | 2,248 | 0,250 |
| **26** | 1,749 | 1,734 | 3,957 | 0,279 |
| **31** | 1,842 | 1,831 | 3,985 | 0,285 |
| **34** | 1,991 | 1,987 | 4,230 | 0,320 |
| **40** | 2,116 | 2,195 | 4,312 | 0,324 |
| **PAD2** | **14** | 1,307 | 1,297 | 3,130 | 0,232 |
| **76** | 2,370 | 2,287 | 4,237 | 0,274 |
| **21** | 1,329 | 1,347 | 2,187 | 0,255 |
| **26** | 1,600 | 1,599 | 3,711 | 0,251 |
| **31** | 1,796 | 1,771 | 3,958 | 0,268 |
| **34** | 1,911 | 1,926 | 4,148 | 0,289 |
| **40** | 2,072 | 2,133 | 4,227 | 0,286 |
| **Condition 3** | **BF 3** | **27** | 1,492 | 1,524 | 2,587 | 0,284 |
| **31** | 1,943 | 1,948 | 3,249 | 0,370 |
| **1** | 1,175 | 1,421 | 0,651 | 0,216 |
| **2** | 0,970 | 1,080 | 0,689 | 0,243 |
| **36** | 1,873 | 1,893 | 3,015 | 0,352 |
| **6** | 1,132 | 1,206 | 2,116 | 0,229 |
| **41** | 1,891 | 1,983 | 2,879 | 0,340 |
| **PAD 3** | **79** | 2,131 | 1,995 | 2,637 | 0,321 |
| **24** | 1,351 | 1,329 | 3,206 | 0,228 |
| **27** | 1,430 | 1,429 | 2,336 | 0,262 |
| **31** | 1,526 | 1,498 | 2,444 | 0,283 |
| **1** | 1,196 | 1,441 | 0,668 | 0,220 |
| **2** | 0,953 | 1,083 | 0,639 | 0,229 |
| **36** | 1,644 | 1,608 | 2,562 | 0,303 |
| **6** | 1,083 | 1,149 | 1,887 | 0,226 |
| **41** | 1,796 | 1,821 | 2,609 | 0,319 |

Table S.I.4 : Individual concentrations of grape polyphenols (in mg.L-1), wood volatile aromas (in µg.L-1) and higher alcohols (in mg.L-1) present in Chardonnay white wines resulting from the three BF/PAD conditions. Standard deviations were added for each analyte concentrations.

|  | **PAD1** | **BF1** | **PAD2** | **BF2** | **PAD3** | **BF3** |
| --- | --- | --- | --- | --- | --- | --- |
| **Grape polyphenols :** | | |  | |  | |
| Gallic acid | 0,08 ± 0.02 | 0,07 ± 0.02 | 0,39 ± 0.05 | 0,26 ± 0.04 | 1,31 ± 0.06 | 0,93 ± 0.08 |
| Protocatechuic acid | 0,36 ± 0.06 | 0,33 ± 0.08 | 0,33 ± 0.03 | 0,37 ± 0.05 | 0,42 ± 0.06 | 0,35 ± 0.05 |
| Hydroxytyrosol | 0,69 ± 0.08 | 0,58 ± 0.06 | 0,58 ± 0.03 | 0,57 ± 0.04 | 0,59 ± 0.05 | 0,56 ± 0.08 |
| Hydroxybenzoic acid | 1,27 ± 0.04 | 1,17 ± 0.04 | 1,33 ± 0.06 | 1,19 ± 0.04 | 1,32 ± 0.04 | 1,33 ± 0.05 |
| Caffeic acid | 0,84 ± 0.02 | 0,99 ± 0.04 | 0,73 ± 0.03 | 1,00 ± 0.02 | 0,67 ± 0.03 | 0,95 ± 0.03 |
| Caftaric acid | 21,59 ± 0.03 | 21,23 ± 0.03 | 22,14 ± 0.04 | 21,09 ± 0.04 | 21,34 ± 0.05 | 19,97 ± 0.04 |
| Coutaric acid | 3,35 ± 0.02 | 3,24 ± 0.02 | 3,55 ± 0.04 | 3,56 ± 0.08 | 3,03 ± 0.03 | 2,81 ± 0.05 |
| GRP | 7,59 ± 0.08 | 7,65 ± 0.07 | 7,91 ± 0.07 | 7,21 ± 0.07 | 7,49 ± 0.09 | 7,22 ± 0.08 |
| Coumaric acid | 0,41 ± 0.06 | 0,41 ± 0.06 | 0,46 ± 0.09 | 0,43 ± 0.04 | 0,45 ± 0.03 | 0,35 ± 0.03 |
| Ferulic acid | 0,07 ± 0.03 | 0,05 ± 0.04 | 0,09 ± 0.03 | 0,09 ± 0.05 | 0,10 ± 0.07 | 0,09 ± 0.07 |
| Tyrosol | 23,46 ± 0.08 | 23,11 ± 0.07 | 25,38 ± 0.09 | 22,66 ± 0.12 | 14,64 ± 0.04 | 14,88 ± 0.06 |
| (+) Catechine | 0,30 ± 0.08 | 0,30 ± 0.09 | 0,36 ± 0.06 | 0,23 ± 0.09 | 0,42 ± 0.08 | 0,44 ± 0.08 |
| (-) Epicatechine | 0,29 ± 0.06 | 0,26 ± 0.05 | 0,20 ± 0.07 | 0,18 ± 0.06 | 0,23 ± 0.07 | 0,18 ± 0.06 |
| **Wood volatile aromas :** | | |  |  |  |  |
| Furfural | 12,23 ± 1.28 | 17,08 ± 1.34 | 520,24 ± 1.43 | 374,12 ± 1.46 | 41,17 ± 1.45 | 5,74 ± 1.45 |
| Guaiacol | 0,10 ± 0.04 | 0,04 ± 0,04 | 1,02 ± 0.06 | 0,61 ± 0.06 | 1,31 ± 0.06 | 0,96 ± 0.07 |
| Cis-whisky Lactone | 3,68 ± 1.08 | 6,60 ± 1.30 | 19,39 ± 1.69 | 29,24 ± 1.80 | 21,76 ± 1.87 | 10,53 ± 1.70 |
| Trans-whisky Lactone | 0,22 ± 0.12 | 0,50 ± 0.15 | 3,08 ± 0.44 | 1,02 ± 0.39 | 5,74 ± 0.40 | 1,83 ± 0.40 |
| Eugenol | 0,66 ± 0.23 | 0,81 ± 0.22 | 2,31 ± 0.86 | 1,40 ± 0.76 | 5,35 ± 0.88 | 3,15 ± 0.70 |
| Vanillin | 7,30 ± 1.20 | 33,72 ± 1.76 | 109,60 ± 1.43 | 49,30 ± 1.40 | 151,95 ± 1.90 | 99,34 ± 1.78 |
| **Higher alcohols :** | | |  |  |  |  |
| phenylethanol | 7,43 ± 0.26 | 3,56 ± 0.30 | 6,71 ± 0.29 | 8,12 ± 0.29 | 4,38 ± 0.32 | 7,53 ± 0.29 |
| methanol | 11,85 ± 0.33 | 6,57 ± 0.32 | 7,62 ± 0.23 | 8,96 ± 0.29 | 9,91 ± 0.25 | 18,90 ± 0.34 |
| propanol | 4,26 ± 0.40 | 3,28 ± 0.23 | 2,78 ± 0.38 | 4,15 ± 0.32 | 5,83 ± 0.29 | 6,26 ± 0.30 |
| 2-methyl-propanol | 4,90 ± 0.29 | 4,30 ± 0.28 | 4,15 ± 0.19 | 5,20 ± 0.28 | 3,98 ± 0.18 | 4,33 ± 0.30 |
| 2-methyl-butanol | 8,32 ± 0.38 | 4,09 ± 0.45 | 3,58 ± 0.43 | 6,94 ± 0.41 | 3,02 ± 0.49 | 5,15 ± 0.37 |
| 3-methyl-butanol | 32,42 ± 0.29 | 28,16 ± 0.32 | 26,62 ± 0.20 | 35,55 ± 0.43 | 23,12 ± 0.30 | 26,30 ± 0.37 |
